# Supplementary material for: Optical coherence tomography angiography microvascular findings in macular edema due to central and branch retinal vein occlusions
Source: PubMed Central journal article supplement (PMC5241684; doi:10.1038/srep40763), 2017-01-18
Supplement: srep40763-s1.pdf [file srep40763-s1.pdf]

**Optical coherence tomography angiography microvascular findings in macular edema due to central and branch retinal vein occlusions**

**Mastropasqua Rodolfo,<sup>1+</sup> Toto Lisa,<sup>2,\*+</sup> Di Antonio Luca,<sup>2</sup> Borrelli Enrico,<sup>2</sup> Senatore Alfonso,<sup>2</sup> Di Nicola Marta,<sup>3</sup> Di Martino Giuseppe,<sup>3</sup>  
Ciancaglini Marco,<sup>4</sup> Paolo Carpineto<sup>2</sup>**

<sup>1</sup>**Ophthalmology Clinic, Moorfields Eye Hospital, London, EC1V 2PD, UK**

<sup>2</sup>**Ophthalmology Clinic, Department of Medicine and Science of Ageing, University G. D'Annunzio Chieti-Pescara, Chieti, 66100, Italy**

<sup>3</sup> **Department of Experimental and Clinical Sciences, Laboratory of Biostatistics, University "G. d'Annunzio" Chieti-Pescara, Chieti, 66100, Italy**

<sup>4</sup> **Ophthalmology Clinic, University of l'Aquila, Aquila, 67100, Italy**

<sup>+</sup>**The first two authors equally contributed to the manuscript and should be considered as co-first authors**

**\* Corresponding Author:**

**Lisa Toto**

**Email: [l.toto@unich.it](mailto:l.toto@unich.it)**

**None of the authors has any proprietary/financial interest to disclose**

**Table S1.** Morphologic parameters (macular thickness) in patients with retinal vein occlusion at baseline.

| Variable                                | Controls     | CRVO            | <i>p</i> -value vs controls | BRVO ST                    | <i>p</i> -value vs controls | BRVO IT       | <i>p</i> -value vs controls | <i>p</i> -value <sup>a</sup> |
|-----------------------------------------|--------------|-----------------|-----------------------------|----------------------------|-----------------------------|---------------|-----------------------------|------------------------------|
| <b>Macular thickness (ILM-RPE) (μm)</b> |              |                 |                             |                            |                             |               |                             |                              |
| Fovea                                   | 251.11±39.67 | 575.25±111.77** | <0.001                      | 373.58±125.47              | <0.001                      | 465.89±145.35 | <0.001                      | 0.034                        |
| ParaFovea                               | 317.42±17.44 | 451.63±66.78    | <0.001                      | 391.33±73.90               | <0.001                      | 420.78±81.96  | <0.001                      | 0.493                        |
| Para-Temporal                           | 307.82±18.49 | 450.63±74.29    | <0.001                      | 395.00±86.96               | <0.001                      | 438.33±94.93  | <0.001                      | 0.493                        |
| Para-Superior                           | 314.16±50.16 | 452.63±72.95    | <0.001                      | 446.83±127.25              | <0.001                      | 347.56±26.42  | 0.465                       | 0.001                        |
| Para-Nasal                              | 321.45±19.84 | 473.38±75.31*   | <0.001                      | 378.92±55.02               | 0.002                       | 404.11±90.50  | <0.001                      | 0.074                        |
| Para-Inferior                           | 318.79±17.30 | 429.63±57.45    | <0.001                      | 345.25±51.10 <sup>++</sup> | 0.493                       | 493.33±150.61 | <0.001                      | <0.001                       |

CRVO, central retinal vein occlusion; BRVO ST, superotemporal branch retinal vein occlusion; BRVO IT, inferotemporal branch retinal vein occlusion;

ILM, inner limiting membrane; RPE, retinal pigment epithelium; IPL, inner plexiform layer.

\* p<0.05; \*\* p<0.01; \*\*\* p<0.001 CRVO vs BRVO ST

◦ p<0.05; ◦◦ p<0.01; ◦◦◦ p<0.001 CRVO vs BRVO IT

+ p<0.05; ++ p<0.01; +++ p<0.001 BRVO ST vs BRVO IT

<sup>a</sup> Probability that values are influenced by type of occlusion (CRVO and BRVO) adjusted for presence of macular ischemia.

**Table S2.** Functional parameters (visual acuity and microperimetry) in patients with retinal vein occlusion after treatment.

| Variable                   | CRVO (n=10)      |                 |                             | BRVO ST (n=12)   |                 |                             | BRVO IT (n=16)   |                 |                             |
|----------------------------|------------------|-----------------|-----------------------------|------------------|-----------------|-----------------------------|------------------|-----------------|-----------------------------|
|                            | Before treatment | After treatment | <i>p-value</i> <sup>a</sup> | Before treatment | After treatment | <i>p-value</i> <sup>a</sup> | Before treatment | After treatment | <i>p-value</i> <sup>a</sup> |
| <b>Microperimetry (dB)</b> |                  |                 |                             |                  |                 |                             |                  |                 |                             |
| 20 degree sensitivity      | 7.39±3.92        | 12.04±1.45      | <b>0.003</b>                | 8.96±4.56        | 10.17±0.36      | 0.313                       | 5.87±3.87        | 8.88±4.58       | <b>0.014</b>                |
| 8 degree sensitivity       | 7.45±4.24        | 10.16±2.27      | <b>0.001</b>                | 11.38±2.35       | 13.33±1.81      | 0.130                       | 7.27±3.32        | 11.33±2.32      | <b>0.041</b>                |
| 4 degree sensitivity       | 7.40±4.23        | 10.76±1.98      | <b>&lt;0.001</b>            | 9.98±3.27        | 11.20±1.08      | 0.181                       | 6.91±3.14        | 10.00±3.50      | <b>0.018</b>                |
| Superior emifield          | 5.50±3.56        | 11.32±2.18      | <b>&lt;0.001</b>            | 9.42±2.63        | 11.30±1.70      | 0.215                       | 5.36±2.94        | 9.10±3.87       | <b>0.013</b>                |
| Inferior emifield          | 3.75±2.20        | 11.86±3.14      | <b>&lt;0.001</b>            | 8.47±2.10        | 12.60±0.62      | <b>&lt;0.001</b>            | 3.96±1.73        | 7.75±2.93       | <b>0.017</b>                |
| <b>BCVA (logMar)</b>       | 0.35±0.12        | 0.10±0.09       | <b>&lt;0.001</b>            | 0.33±0.29        | 0.50±0.09       | <b>0.001</b>                | 0.41±0.28        | 0.15±0.12       | <b>0.003</b>                |

CRVO, central retinal vein occlusion; BRVO ST, superotemporal branch retinal vein occlusion; BRVO IT, inferotemporal branch retinal vein occlusion.

<sup>a</sup>Probability that values are influenced by treatment adjusted for presence of macular ischemia

**Table S3.** Morphologic parameters (macular thickness) in patients with retinal vein occlusion after treatment

|                                         | CRVO (n=10)      |                 |                             | BRVO ST (n=12)   |                 |                             | BRVO IT (n=16)   |                 |                             |
|-----------------------------------------|------------------|-----------------|-----------------------------|------------------|-----------------|-----------------------------|------------------|-----------------|-----------------------------|
|                                         | Before treatment | After treatment | <i>p-value</i> <sup>a</sup> | Before treatment | After treatment | <i>p-value</i> <sup>a</sup> | Before treatment | After treatment | <i>p-value</i> <sup>a</sup> |
| <b>Macular thickness (ILM-RPE) (µm)</b> |                  |                 |                             |                  |                 |                             |                  |                 |                             |
| Fovea                                   | 575.25±111.77    | 272.20±45.74    | <b>&lt;0.001</b>            | 373.58±125.47    | 258.00±26.35    | <b>0.028</b>                | 465.89±145.35    | 290.50±89.70    | <b>0.015</b>                |
| ParaFovea                               | 451.63±66.78     | 329.40±18.86    | <b>&lt;0.001</b>            | 391.33±73.90     | 328.33±48.67    | <b>0.027</b>                | 420.78±81.96     | 334.75±40.65    | 0.057                       |
| Para-Temporal                           | 450.63±74.29     | 311.00±10.69    | <b>0.001</b>                | 395.00±86.96     | 323.00±62.82    | <b>0.034</b>                | 438.33±94.93     | 351.75±81.84    | <b>0.036</b>                |
| Para-Superior                           | 452.63±72.95     | 337.00±19.74    | <b>&lt;0.001</b>            | 446.83±127.25    | 333.67±67.67    | <b>0.023</b>                | 347.56±26.42     | 341.50±34.23    | 0.074                       |
| Para-Nasal                              | 473.38±75.31     | 335.80±31.90    | <b>&lt;0.001</b>            | 378.92±55.02     | 339.00±49.97    | <b>0.021</b>                | 404.11±90.50     | 326.75±19.70    | 0.101                       |
| Para-Inferior                           | 429.63±57.45     | 333.80±15.92    | <b>&lt;0.001</b>            | 345.25±51.10     | 317.33±13.87    | 0.155                       | 493.33±150.61    | 320.00±48.09    | 0.054                       |

CRVO, central retinal vein occlusion; BRVO ST, superotemporal branch retinal vein occlusion; BRVO IT, inferotemporal branch retinal vein occlusion.

<sup>a</sup>Probability that values are influenced by treatment adjusted for presence of macular ischemia

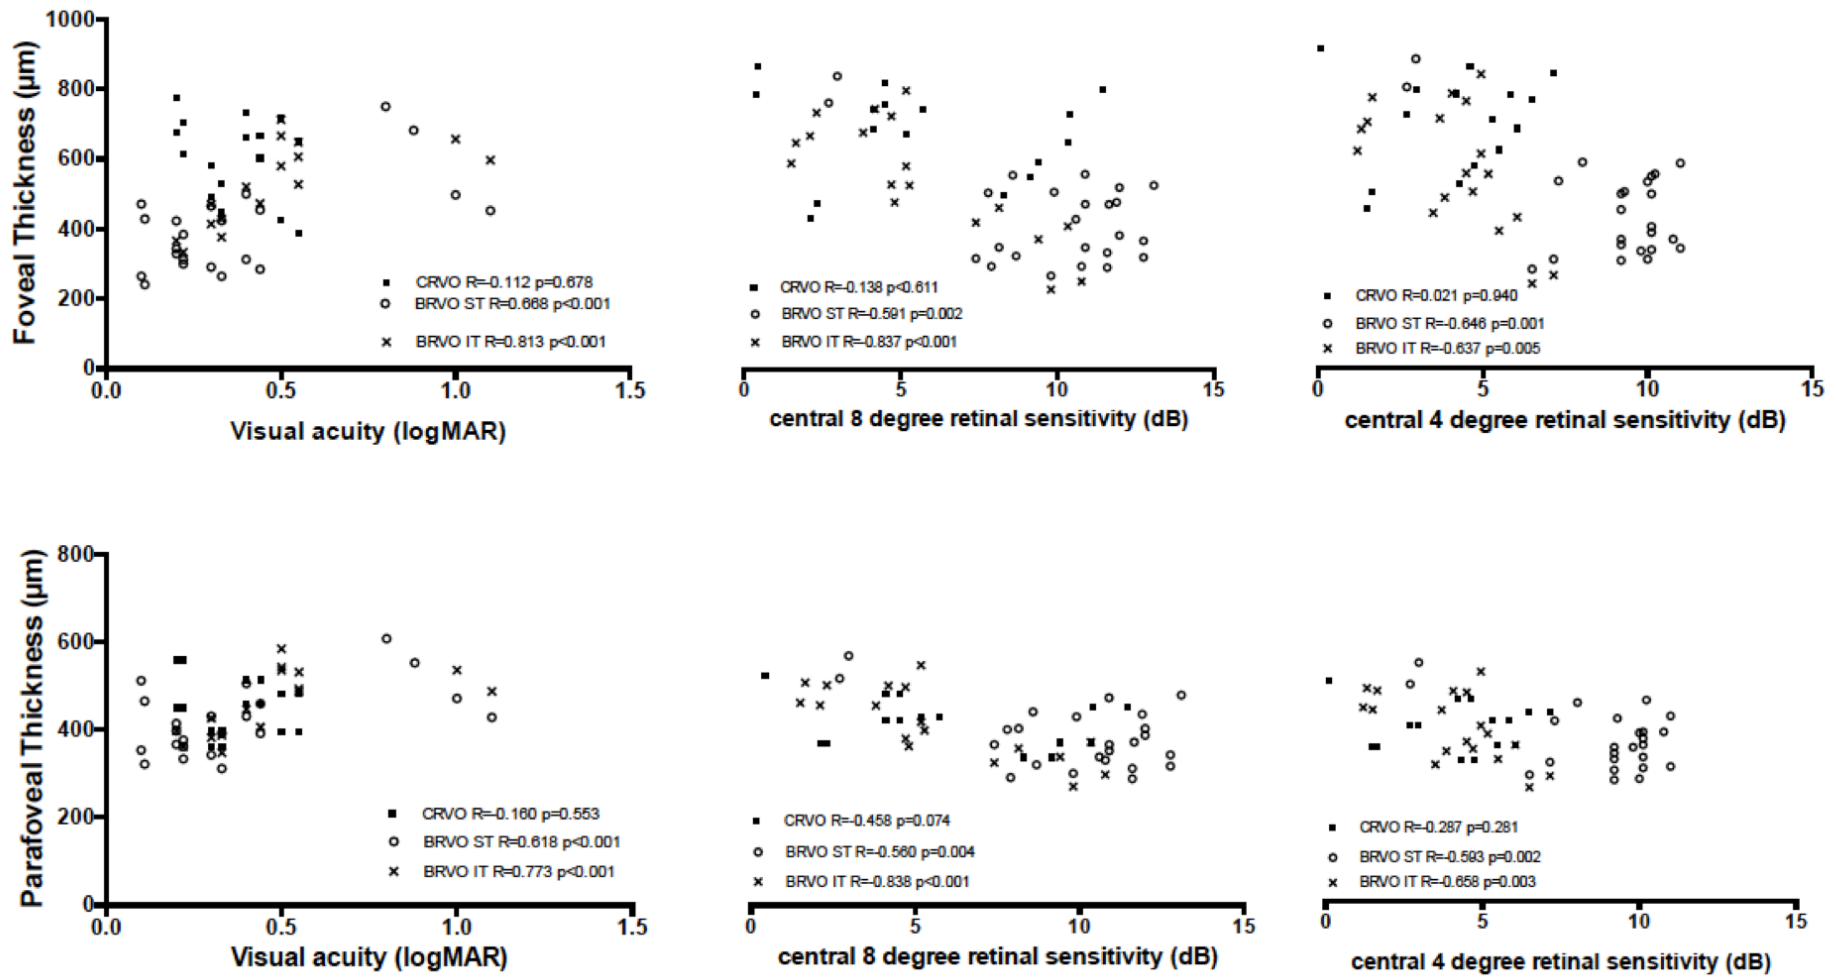

**Figure 1S.** Correlations [Pearson correlation coefficient (R)] between morphological (foveal and parafoveal thickness) and functional parameters (visual acuity and microperimetry at 4 and 8 degree) in RVOs patients.
